# Supplementary material for: An in vivo bioelectronic nose for possible quantitative evaluation of odor masking using M/T cell spatial response patterns
Source: Royal Society of Chemistry journal article supplement (doi:10.1039/d1an01569a), 2021-11-17
Supplement: d1an01569a1.pdf [file d1an01569a1.pdf]

## Supplementary Information

### **An *in vivo* bioelectronic nose for possible quantitative evaluation of odor masking using M/T cell spatial response patterns**

Qunchen Yuan <sup>a, b</sup>, Chunlian Qin <sup>a</sup>, Yan Duan <sup>a</sup>, Nan Jiang <sup>a</sup>, Mengxue Liu <sup>a</sup>, Hao

Wan <sup>a, c, d</sup>, Liuqing Zhuang <sup>a, b, c, \*</sup>, Ping Wang <sup>a, b, c, d\*</sup>

<sup>a</sup> *Biosensor National Special Laboratory, Key Laboratory for Biomedical Engineering of Education Ministry, Department of Biomedical Engineering, Zhejiang University, Hangzhou 310027, China*

<sup>b</sup> *The MOE Frontier Science Center for Brain Science & Brain-machine Integration, Zhejiang University, Hangzhou 310027, China*

<sup>c</sup> *State Key Laboratory of Transducer Technology, Chinese Academy of Sciences, Shanghai, 200050, China*

<sup>d</sup> *Binjiang Institute of Zhejiang University, Hangzhou, 310053, China*

*\*Corresponding author: Ping Wang, [cnpwang@zju.edu.cn](mailto:cnpwang@zju.edu.cn); Liuqing Zhuang, [thisiszlj@163.com](mailto:thisiszlj@163.com).*

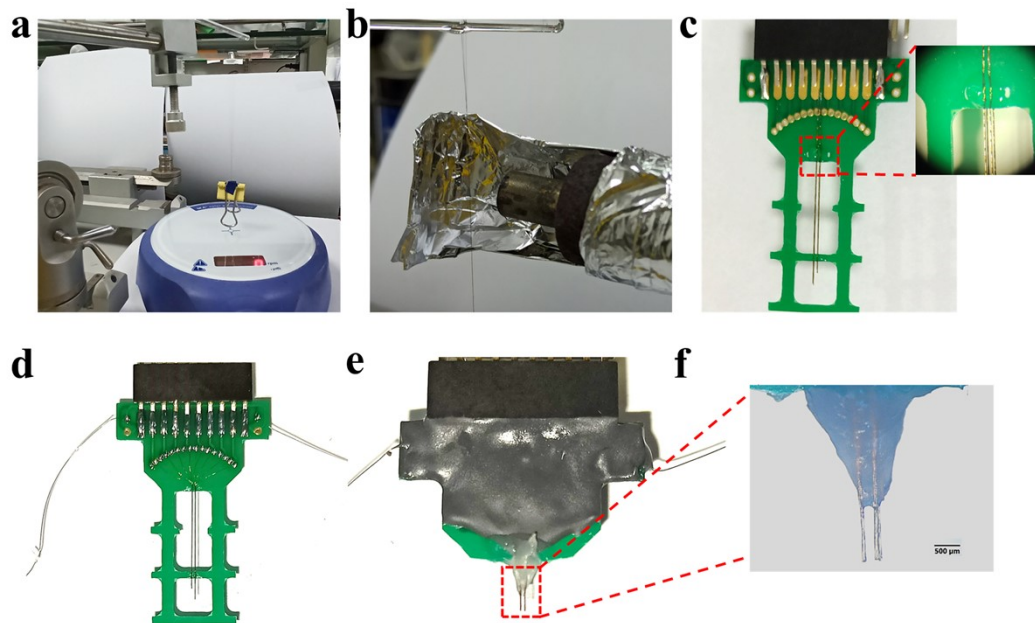

**Figure. S1 Tetrode manufacture.** (a) Two nichrome wires were rotated above the magnetic stirrer to form a tetrode. (b) The heat gun partly melted the insulating layer of the microwires together. (c) Four tetrodes were arranged on the PCB, and the subgraph showed the detail of the arrangement. (d) Four tetrodes and two stainless steel wires as ground wires were connected to the PCB board. (e) J-B Weld gel was used to protect the microwires. (f) PEG-4000 wrapped part of tetrodes to reduce implant deformation.

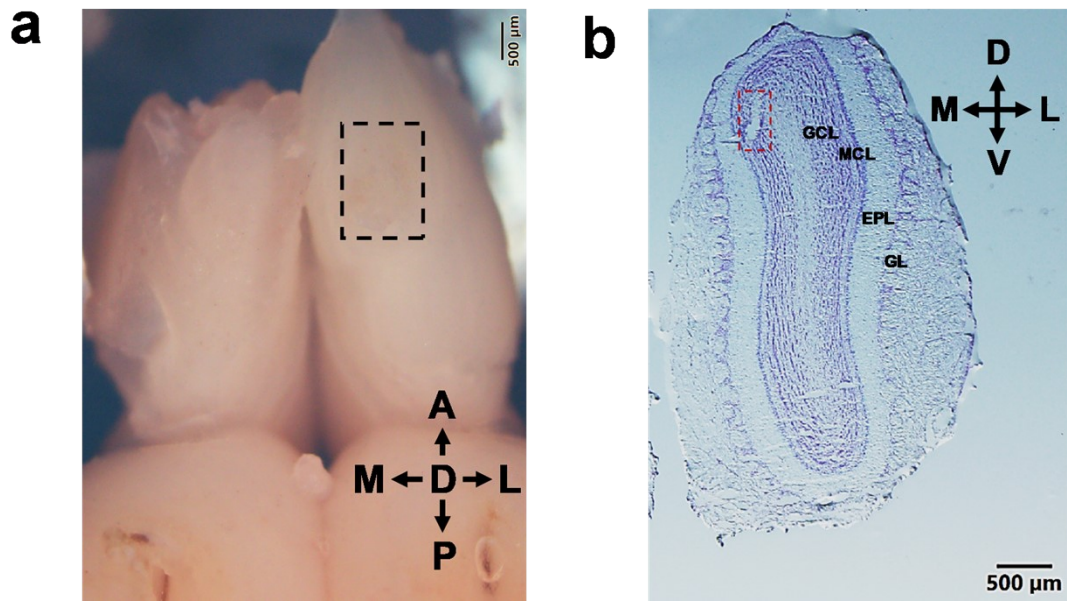

**Figure. S2 Implanted sites confirmation.** (a) The area of implantation (bar = 500  $\mu$ m). The black dotted rectangle indicated the area of the cranial window. (b) Nissl staining chart of the OB slice showing the site of the electrode in the red dotted rectangle (bar = 500  $\mu$ m). A:anterior, D: dorsal, P: posterior, M: medial, L: lateral, V: ventral. GL: glomeruli layer, EPL: external plexiform layer, MCL: mitral cell layer, GCL: granular cell layer.

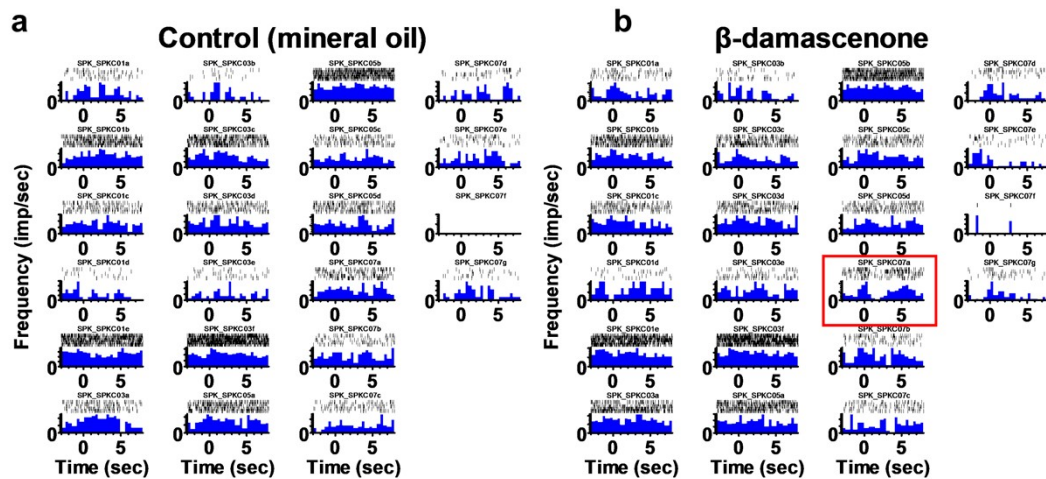

**Figure. S3** Response property of M/T cells to mineral oil and  $\beta$  -damascenone. PSTH of M/T cells response to mineral oil (a) and  $\beta$ -damascenone (b). The red rectangle indicated the inhibit response.
